# Supplementary material for: Mixed-methods feasibility outcomes for a novel ACT-based video game ‘ACTing Minds’ to support mental health
Source: PubMed Central journal article supplement (PMC10982759; doi:10.1136/bmjopen-2023-080972), 2024-03-29

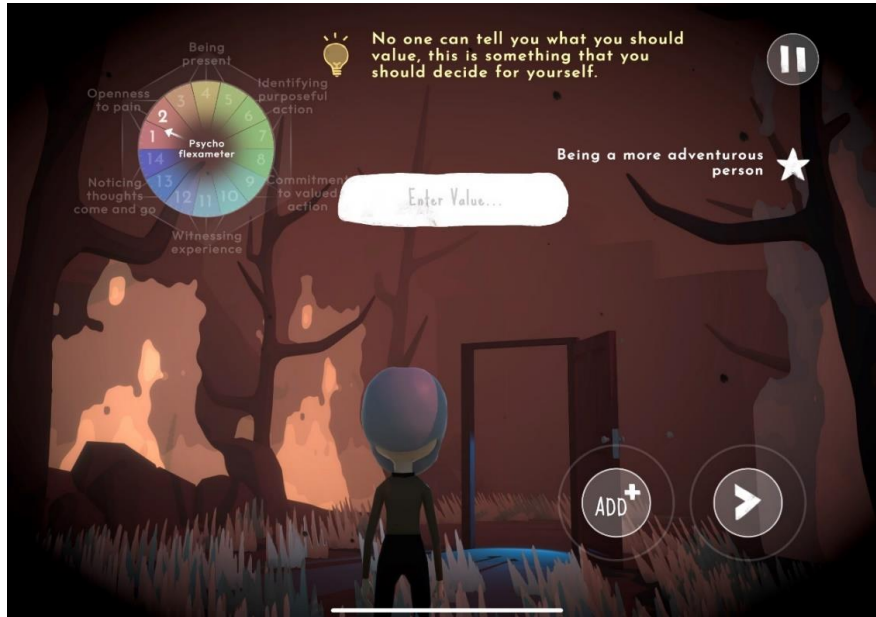

Supplement: bmjopen-2023-080972supp009.pdf [file bmjopen-2023-080972supp009.pdf]
